# Supplementary material for: Interpretable Machine Learning Quantifies Composition and Size Controls on Aerosol Spectral Absorption
Source: Copernicus journal article supplement (doi:10.5194/egusphere-2025-6118), 2026-01-09
Supplement: Supplementary file 1 [file egusphere-2025-6118-supplement.pdf]

# **Supplementary materials for**

## **Interpretable Machine Learning Quantifies Composition and Size Controls on Aerosol Spectral Absorption**

**Wenfang Wang<sup>1</sup>, Pengfei Tian<sup>1,2\*</sup>, Shuhua Zeng<sup>1</sup>, Yifei Zhang<sup>1</sup>, Zeren Yu<sup>1</sup>, Chen  
Cui<sup>1</sup>, Yunfei Wu<sup>3</sup>, Min Chen<sup>1</sup>, Lei Zhang<sup>1,2</sup>**

<sup>1</sup> Key Laboratory for Semi-Arid Climate Change of the Ministry of Education, College  
of Atmospheric Sciences, Lanzhou University, Lanzhou 730000, China.

<sup>2</sup> Collaborative Innovation Center for Western Ecological Safety, Lanzhou University,  
Lanzhou 730000, China.

<sup>3</sup> State Key Laboratory of Atmospheric Environment and Extreme Meteorology,  
Institute of Atmospheric Physics, Chinese Academy of Sciences, Beijing 100029,  
China.

Corresponding author: P. Tian ([tianpf@lzu.edu.cn](mailto:tianpf@lzu.edu.cn)) and M. Chen ([chenmin@lzu.edu.cn](mailto:chenmin@lzu.edu.cn))

Contents of this file

Text S1 to S2

Table S1

Figures S1 to S12

20 Text S1. Stokes Diameter Conversion Aerodynamic Diameter.

21 SMPS used 8.82-310.6 nm data and APS used 0.523-19.81  $\mu\text{m}$  data. For particle  
22 density of  $1.7 \text{ g}\cdot\text{cm}^{-3}$  the particle diameter 310.6 nm corresponds to the aerodynamic  
23 diameter  $D_a = \sqrt{\rho_p/\rho_0} D_p \cong 405 \text{ nm}$ , where  $\rho_0 = 1 \text{ g}\cdot\text{cm}^{-3}$ , and  $\rho = 1.7 \text{ g}\cdot\text{cm}^{-3}$  is  
24 constant over the whole size range (Shang et al., 2018).

25 Text S2. Offline chemical analysis of filter samples.

26 For WSII, one quarter of each filter was cut into small pieces and extracted with  
27 10 mL ultrapure water ( $>18 \text{ M}\Omega\cdot\text{cm}$ ) by ultrasonication for 30 min; the extraction was  
28 repeated once, and the combined extracts were brought to 25 mL with ultrapure water.  
29 The extract was filtered through a  $0.45 \mu\text{m}$  membrane (GHP, model 4563, Pall Inc.,  
30 USA) and stored at  $4^\circ\text{C}$  prior to ion chromatography (881 Compact IC Pro, Metrohm,  
31 Switzerland; and ICS-1500, Dionex Inc., USA). Cations ( $\text{Na}^+$ ,  $\text{K}^+$ ,  $\text{NH}_4^+$ ,  $\text{Ca}^{2+}$ ,  $\text{Mg}^{2+}$ )  
32 were measured with ion chromatograph (881 Compact IC Pro, Metrohm, Switzerland)  
33 equipped with a Metrosep C4 column. The eluent was  $1.75 \text{ mM HNO}_3 + 0.75 \text{ mM}$   
34 dipicolinic acid. Anions ( $\text{Cl}^-$ ,  $\text{NO}_3^-$ ,  $\text{SO}_4^{2-}$ ) were measured with an ion chromatograph  
35 (ICS-1500, Dionex Inc., USA) equipped with an IonPac AS22 column. The eluent was  
36  $4.5 \text{ mM Na}_2\text{CO}_3 + 1.4 \text{ mM NaHCO}_3$ . The method detection limits (MDLs) were 0.05,  
37 0.10, 0.19, 0.04, 0.01, 0.02, and  $0.02 \text{ mg}\cdot\text{L}^{-1}$  for  $\text{K}^+$ ,  $\text{NH}_4^+$ ,  $\text{Ca}^{2+}$ ,  $\text{Mg}^{2+}$ ,  $\text{Cl}^-$ ,  $\text{NO}_3^-$ , and  
38  $\text{SO}_4^{2-}$ , respectively. Due to generally elevated  $\text{Na}^+$  blanks associated with quartz-fiber  
39 filters and glassware,  $\text{Na}^+$  was excluded here.

40 One quarter of each quartz-fiber filter was used for elemental analysis. The filter

portion was cut into small pieces and transferred to a digestion bottle. Concentrated nitric acid ( $\text{HNO}_3$ , 68%, 10 mL) was added, and the mixture was heated until digestion was complete. After cooling, the digest was diluted to 20 mL with ultrapure water. The resulting solutions were analyzed for Al, Ca, Mg, Fe, and Ti using inductively coupled plasma–atomic emission spectrometry (ICP-AES; iCAP 7400, Thermo, USA). The MDLs were 0.02, 0.19, 0.02, 0.07, and 0.00  $\text{mg}\cdot\text{L}^{-1}$  for Al, Ca, Mg, Fe, and Ti, respectively.

A circular area of each filter sample using a 0.504  $\text{cm}^2$  punch was cut for the analysis of OC and EC by thermal/optical carbon analyzer (DRI Model 2015, USA) following the thermal/optical reflectance (TOR) method (Chow et al., 2007). Briefly, a filter punch was progressively heated to evolve carbon fractions under stepwise temperature programs. OC fractions were evolved in a pure He atmosphere at 120 °C (OC1), 250 °C (OC2), 450 °C (OC3), and 550 °C (OC4). Subsequently, EC fractions were evolved in an oxidizing atmosphere of 2%  $\text{O}_2$  and 98% He at 550 °C (EC1), 700 °C (EC2), and 800 °C (EC3). Evolved carbon was oxidized to  $\text{CO}_2$  and then reduced to  $\text{CH}_4$  for detection using a flame ionization detector. Pyrolyzed organic carbon (OPC) was monitored using the laser reflectance signal and was defined when the reflected laser signal returned to its initial value after the introduction of  $\text{O}_2$  into the analysis atmosphere. OC was calculated as  $\text{OC1} + \text{OC2} + \text{OC3} + \text{OC4} + \text{OPC}$ , whereas EC was calculated as  $\text{EC1} + \text{EC2} + \text{EC3} - \text{OPC}$ . The MDLs were 0.18 and 0.04  $\mu\text{g}\cdot\text{m}^{-2}$  for OC and EC, respectively.

Table S1. Correlation Matrix of Aerosol Chemical Species

|                               | NH <sub>4</sub> <sup>+</sup> | K <sup>+</sup> | Mg <sup>2+</sup> | Ca <sup>2+</sup> | Cl <sup>-</sup> | SO <sub>4</sub> <sup>2-</sup> | NO <sub>3</sub> <sup>-</sup> | OC    | EC    | Al   | Ca    | Fe    | Mg   | Ti    |
|-------------------------------|------------------------------|----------------|------------------|------------------|-----------------|-------------------------------|------------------------------|-------|-------|------|-------|-------|------|-------|
| NH <sub>4</sub> <sup>+</sup>  | 1.00                         | 0.90           | 0.25             | -0.07            | 0.50            | 0.95                          | 0.99                         | 0.83  | 0.78  | 0.08 | 0.07  | 0.34  | 0.23 | 0.20  |
| K <sup>+</sup>                |                              | 1.00           | 0.36             | -0.07            | 0.52            | 0.85                          | 0.89                         | 0.84  | 0.82  | 0.03 | -0.03 | 0.24  | 0.20 | 0.09  |
| Mg <sup>2+</sup>              |                              |                | 1.00             | 0.76             | 0.74            | 0.24                          | 0.23                         | 0.35  | 0.33  | 0.30 | 0.31  | 0.03  | 0.34 | 0.08  |
| Ca <sup>2+</sup>              |                              |                |                  | 1.00             | 0.33            | -0.05                         | -0.07                        | -0.06 | -0.05 | 0.11 | 0.11  | -0.15 | 0.11 | -0.09 |
| Cl <sup>-</sup>               |                              |                |                  |                  | 1.00            | 0.45                          | 0.48                         | 0.57  | 0.54  | 0.35 | 0.39  | 0.13  | 0.40 | 0.18  |
| SO <sub>4</sub> <sup>2-</sup> |                              |                |                  |                  |                 | 1.00                          | 0.95                         | 0.76  | 0.72  | 0.09 | 0.08  | 0.27  | 0.19 | 0.21  |
| NO <sub>3</sub> <sup>-</sup>  |                              |                |                  |                  |                 |                               | 1.00                         | 0.82  | 0.77  | 0.07 | 0.06  | 0.34  | 0.23 | 0.19  |
| OC                            |                              |                |                  |                  |                 |                               |                              | 1.00  | 0.82  | 0.10 | 0.10  | 0.35  | 0.22 | 0.08  |
| EC                            |                              |                |                  |                  |                 |                               |                              |       | 1.00  | 0.00 | -0.02 | 0.14  | 0.12 | 0.00  |
| Al                            |                              |                |                  |                  |                 |                               |                              |       |       | 1.00 | 0.88  | 0.07  | 0.91 | 0.11  |
| Ca                            |                              |                |                  |                  |                 |                               |                              |       |       |      | 1.00  | 0.15  | 0.86 | 0.20  |
| Fe                            |                              |                |                  |                  |                 |                               |                              |       |       |      |       | 1.00  | 0.11 | 0.60  |
| Mg                            |                              |                |                  |                  |                 |                               |                              |       |       |      |       |       | 1.00 | 0.07  |
| Ti                            |                              |                |                  |                  |                 |                               |                              |       |       |      |       |       |      | 1.00  |

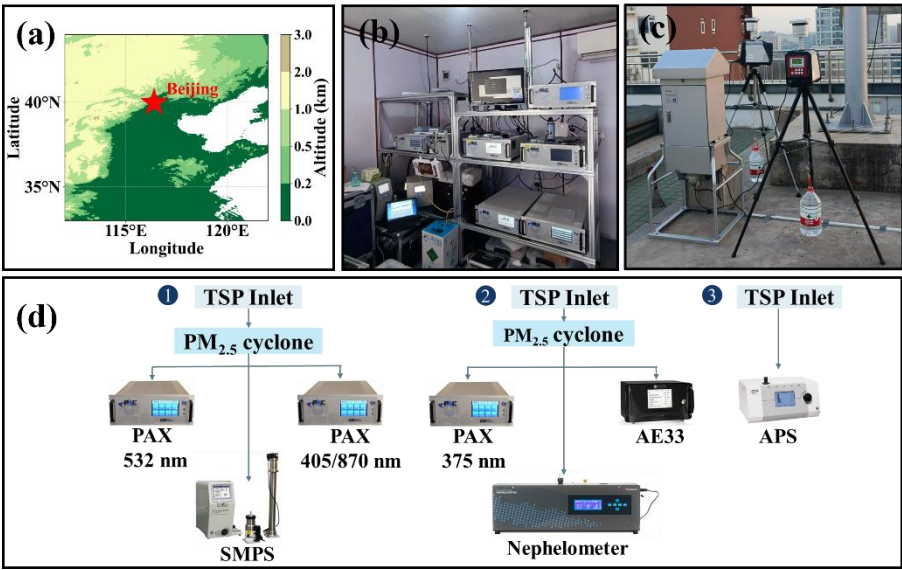

**Figure S1.** Geographic location of observation site and observation instruments. (a) Geographical map, location of the field campaign. (b, c) Photographs during the field campaign. (d) Airflow settings of the online instruments.

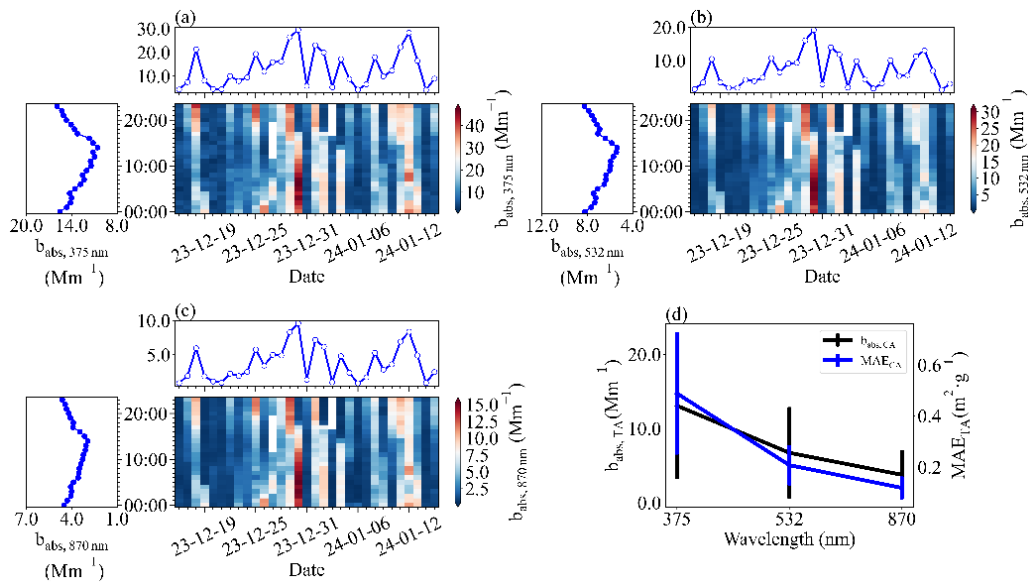

**Figure S2.** (a, b, c) The time series of mass concentrations of absorption coefficients at 375, 405, 870 nm, mass absorption efficiency at 375, 405, 870 nm. (d). Wavelength dependence of absorption coefficients and mass absorption efficiency.

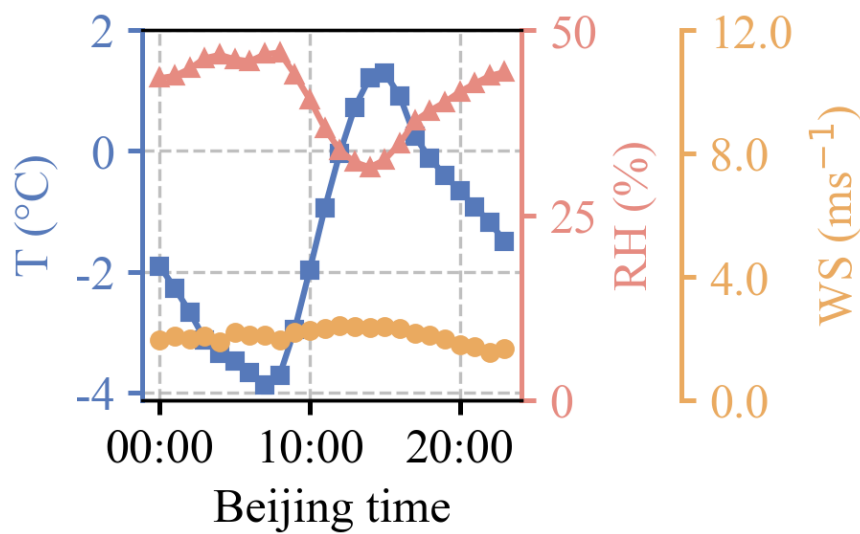

**Figure S3.** Daily variation of Temperature, Relative Humidity, Wind Speed.

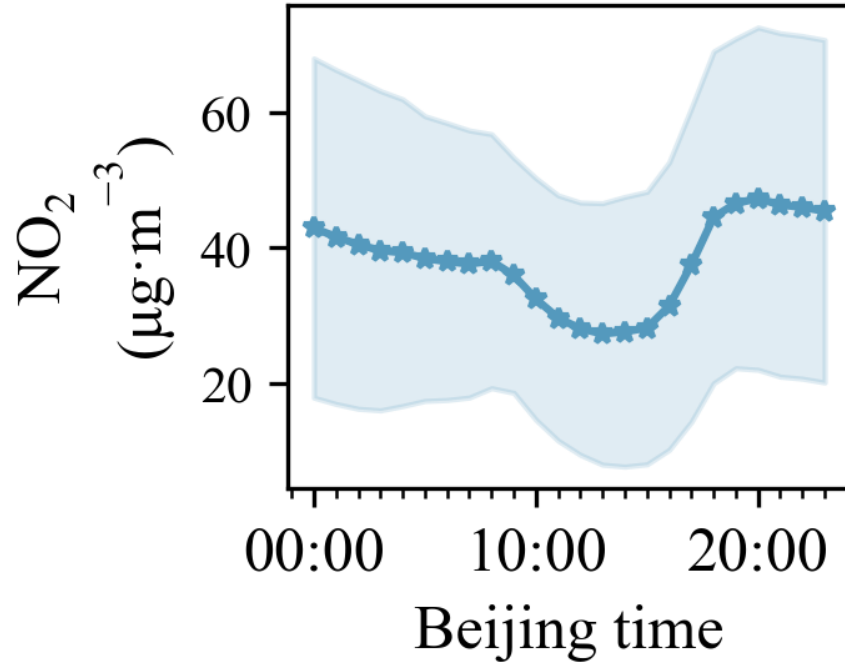

**Figure S4.** Daily variation of nitrogen dioxide ( $\text{NO}_2$ ). Hourly  $\text{NO}_2$  mass concentrations were obtained from the China National Environmental Monitoring Network for the Beijing urban site.

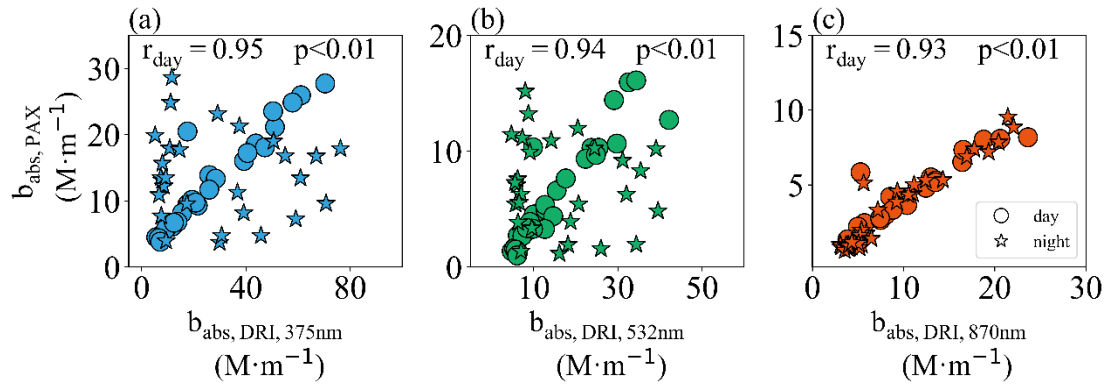

**Figure S5.** Scatter plots of the aerosol absorption coefficients between PAX and DRI. (a) 375 nm. (b) 532 nm. (c) 870nm.

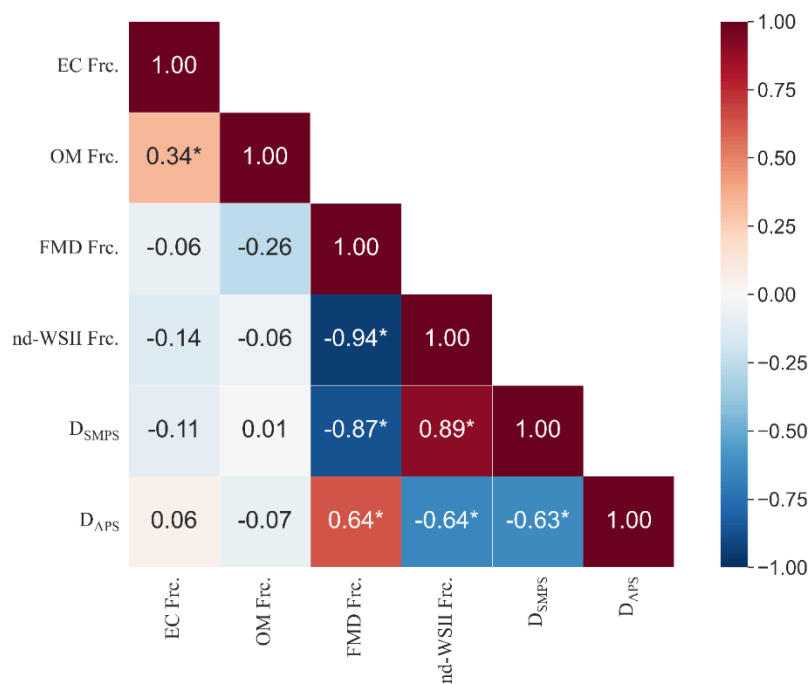

**Figure S6.** Correlation analysis among chemical composition (non-dust water-soluble ions (nd-WSII), fine mineral dust (FMD), elemental carbon (EC), organic matter (OM)) fraction and size parameter (fine-mode mean diameter from SMPS ( $D_{SMPS}$ ), coarse-mode mean diameter from APS ( $D_{APS}$ )).

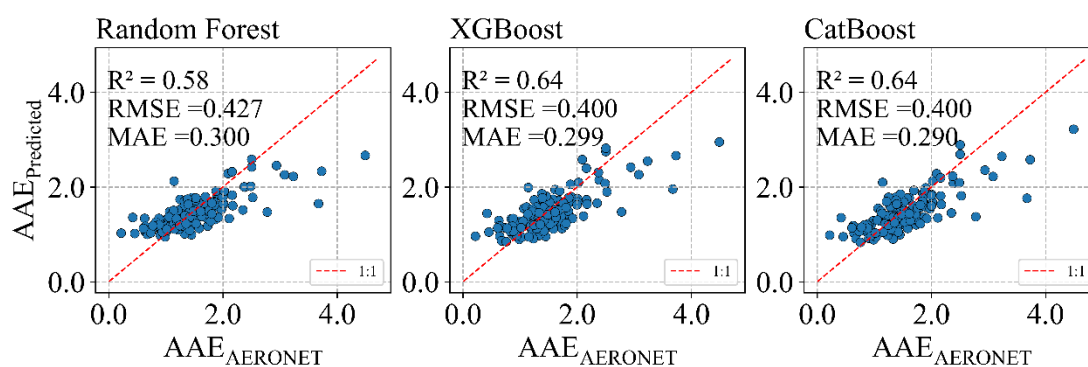

**Figure S7.** Comparison of aerosol absorption Ångström exponent (AAE) predictions and AERONET observations by different models.

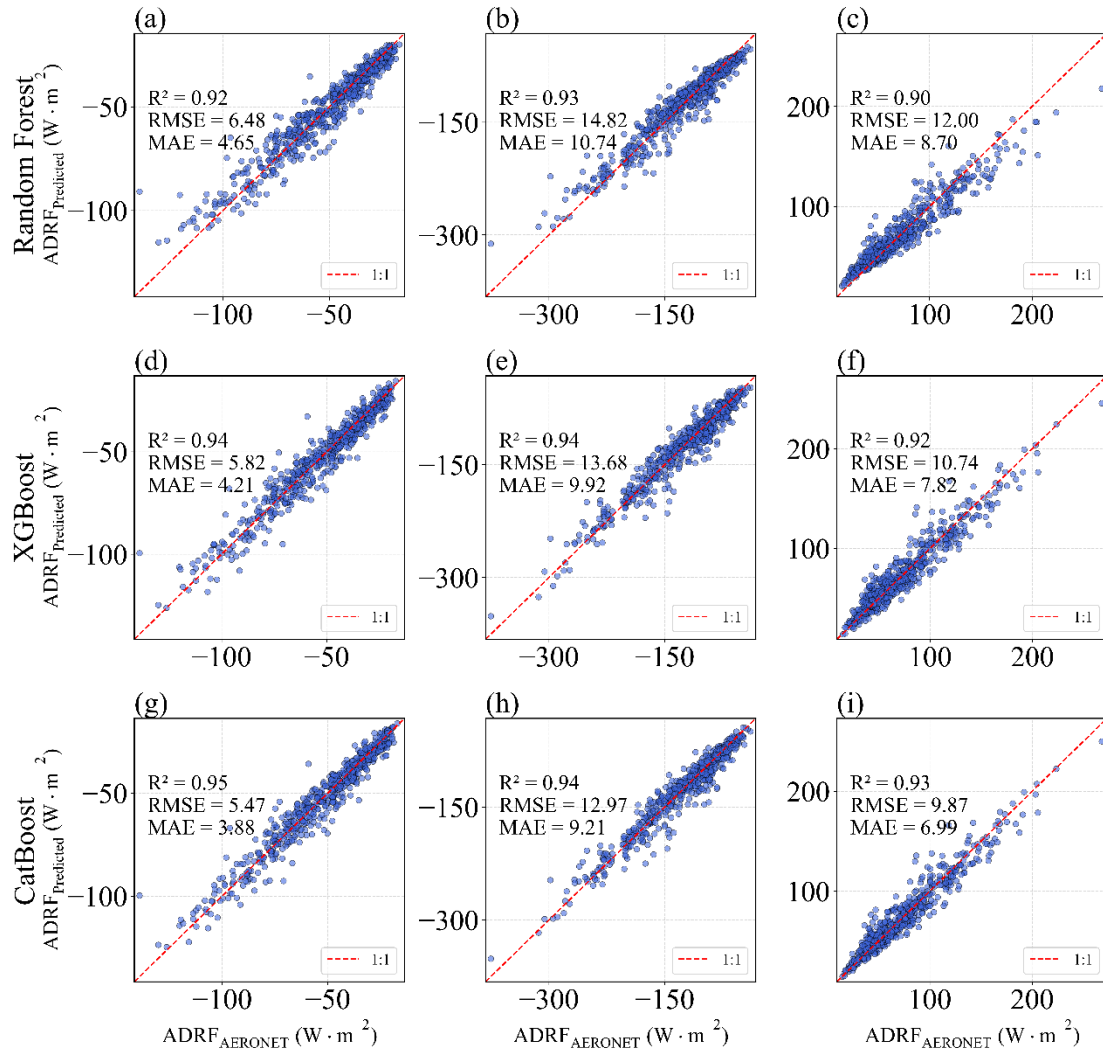

**Figure S8.** Comparison of aerosol direct radiative forcing (ADRF) predictions and AERONET observations by different models.



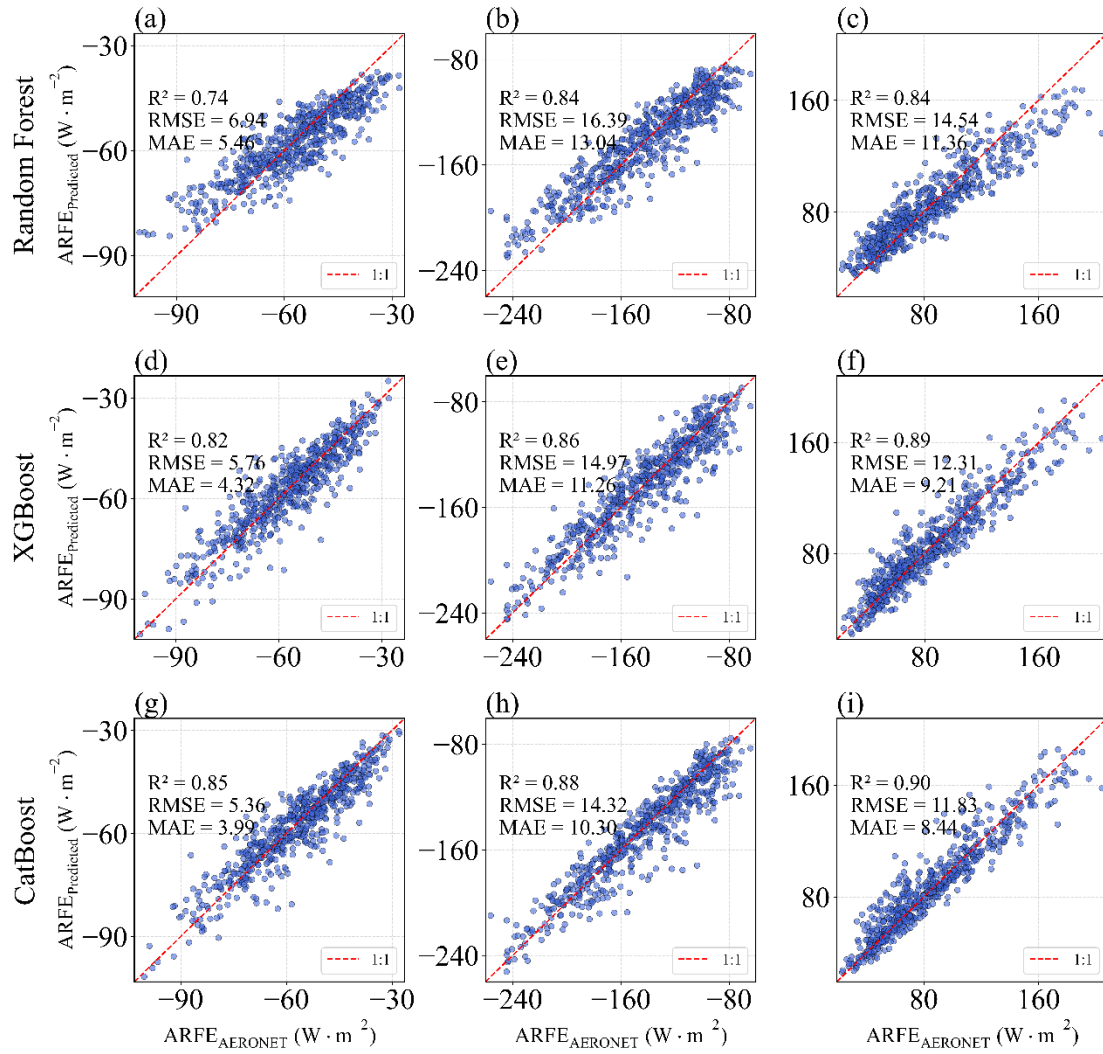

95

96 **Figure S9.** Comparison of aerosol radiative forcing efficiency (ARFE) predictions and  
 97 AERONET observations by different models.

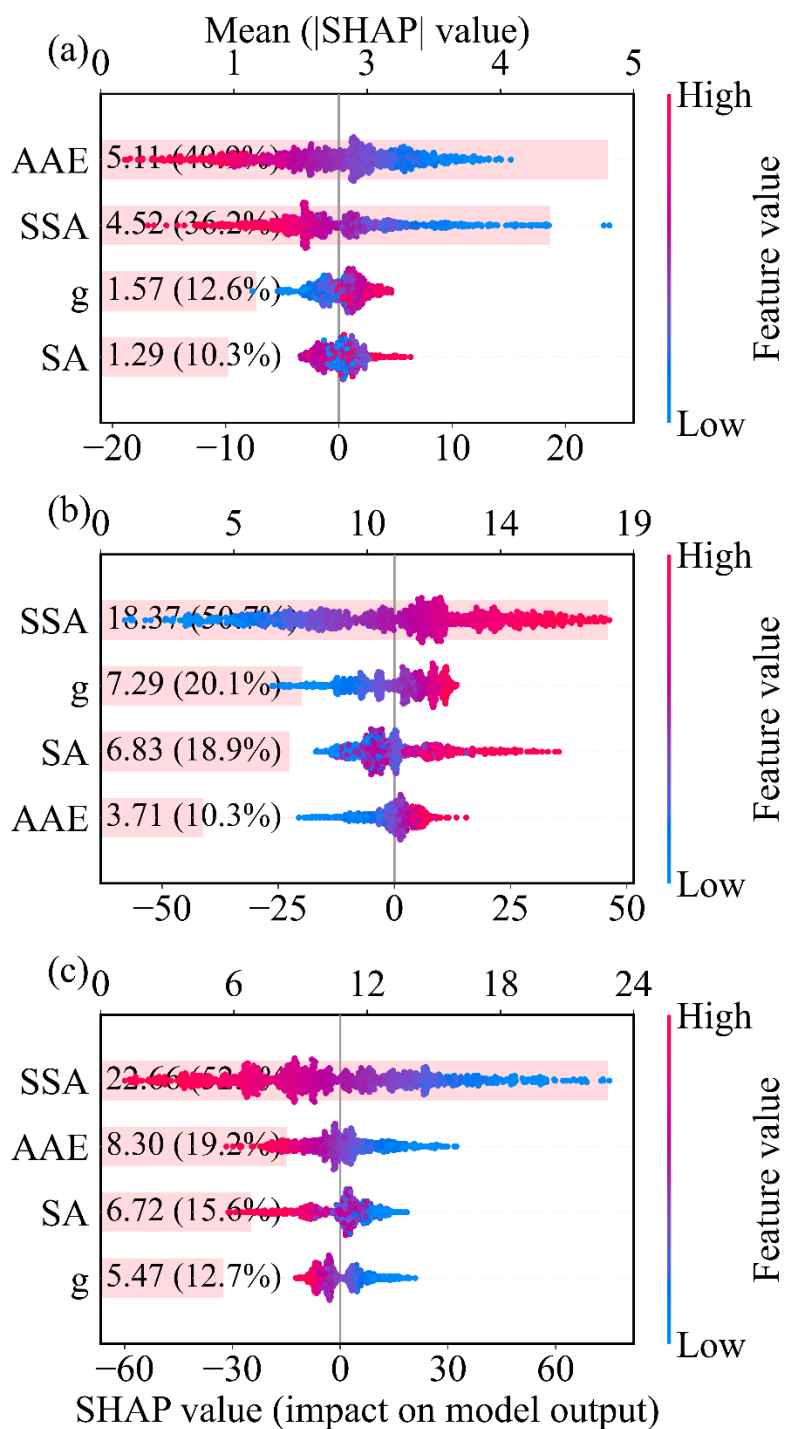

98

99 **Figure S10.** SHAP analysis with AOD fixed at its 25th percentile quantifies the relative  
 100 contributions of single scattering albedo (SSA), asymmetry parameter (g), surface albedo (SA)  
 101 and columnar AAE in driving aerosol radiative forcing efficiency (ARFE) variations at the top  
 102 of the atmosphere (a), bottom (b), and in the atmosphere (c). The mean absolute SHAP values

103 (numbers in parentheses) indicate the relative contribution of each predictor to the model output.

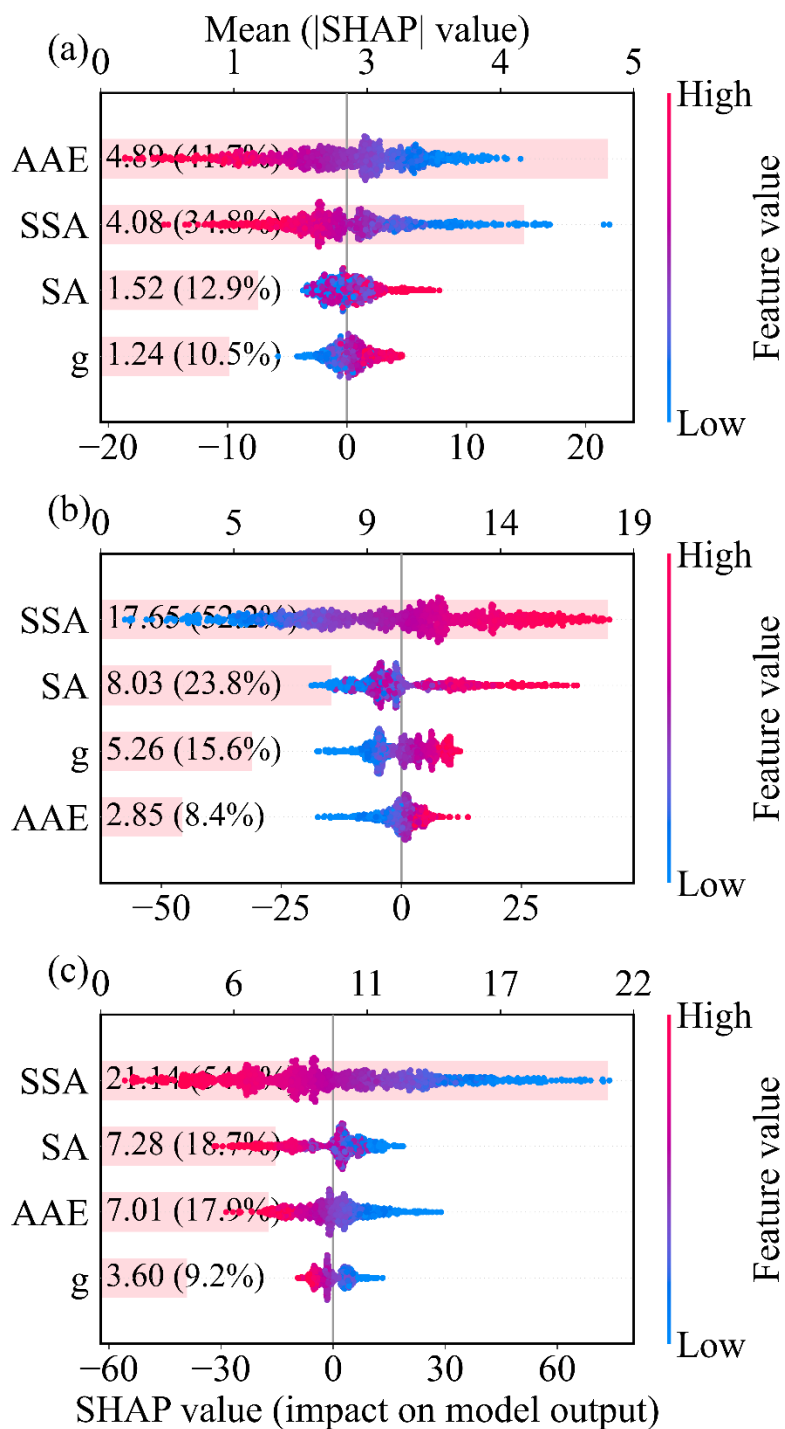

104

105 **Figure S11.** Same as Figure S10, except aerosol optical depth (AOD) is fixed at its 75th  
 106 percentile.

107

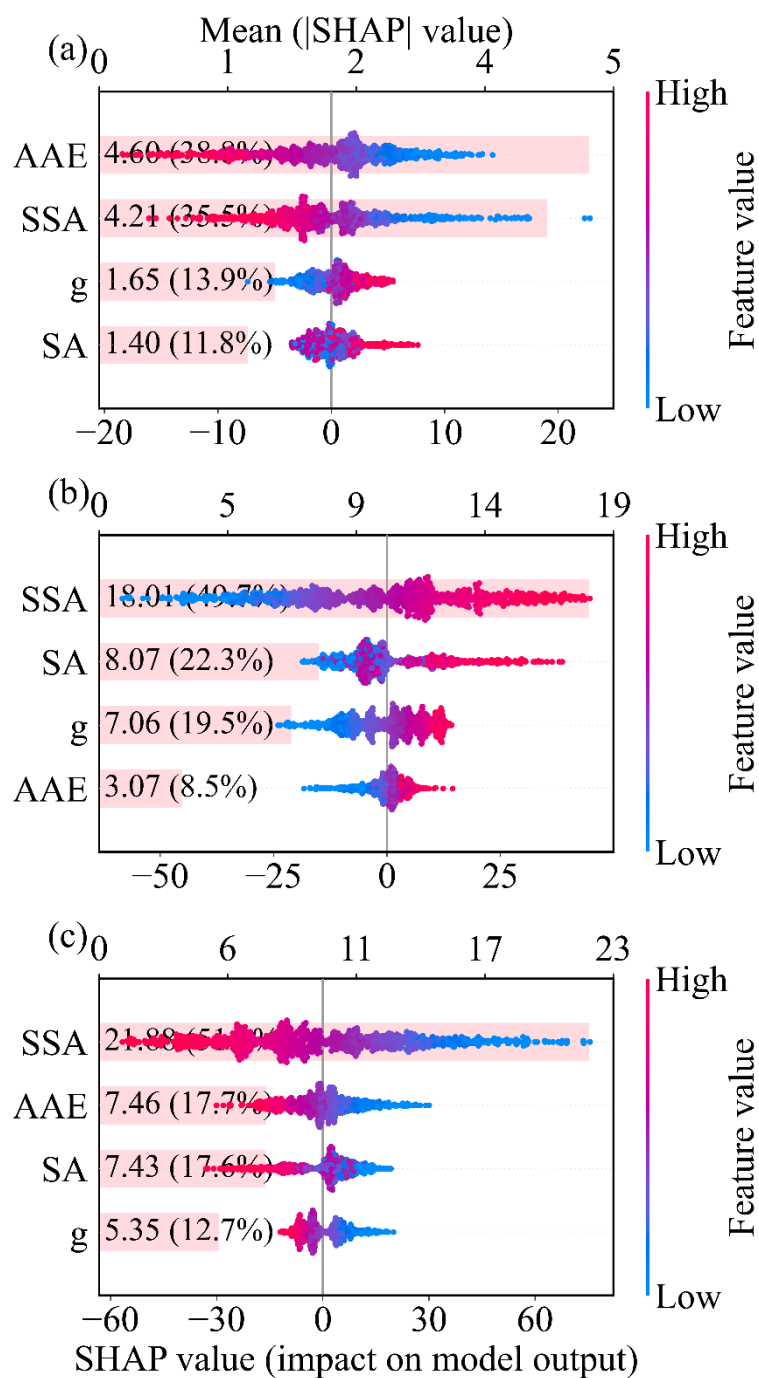

**Figure S12.** Same as Figure S10, except aerosol optical depth (AOD) is fixed at its mean value.

## References

- Shang, D., Hu, M., Zheng, J., Qin, Y., Du, Z., Li, M., Fang, J., Peng, J., Wu, Y., Lu, S.,  
and Guo, S.: Particle number size distribution and new particle formation under  
the influence of biomass burning at a high altitude background site at Mt. Yulong  
(3410 m), China, *Atmos. Chem. Phys.*, 18, 15687–15703,  
<https://doi.org/10.5194/acp-18-15687-2018>, 2018.
- Chow, J. C., Watson, J. G., Chen, L.-W. A., Chang, M. C. O., Robinson, N. F., Trimble,  
D., and Kohl, S.: The IMPROVE\_A Temperature Protocol for Thermal/Optical  
Carbon Analysis: Maintaining Consistency with a Long-Term Database, *Journal  
of the Air & Waste Management Association*, 57, 1014–1023,  
<https://doi.org/10.3155/1047-3289.57.9.1014>, 2007.
